# Supplementary material
Source: PubMed Central journal article supplement (PMC6092248)
Supplement: NIHMS942117-supplement-Supplemental_Data_File___doc___tif__pdf__etc___4.pdf [file NIHMS942117-supplement-Supplemental_Data_File___doc___tif__pdf__etc___4.pdf]

## Supplementary Figure 2

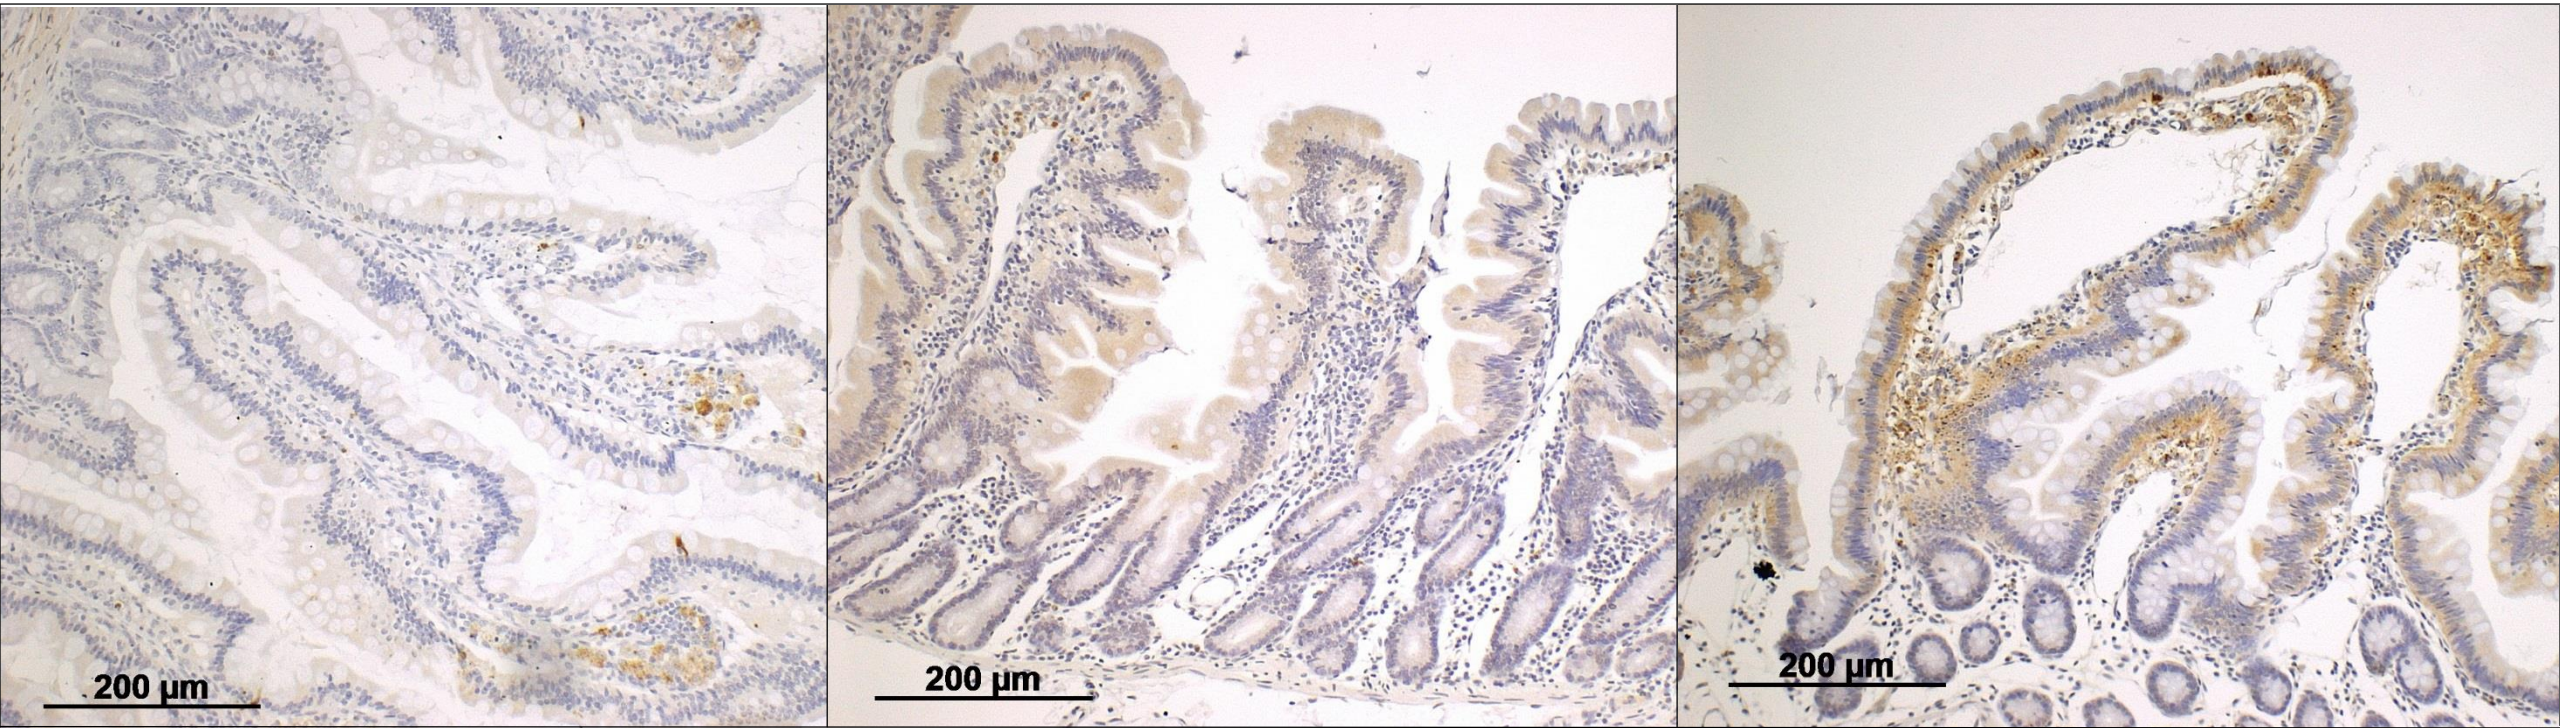

**Ctrl**

**HS + CP40**

**HS + NaCl**

Immunohistochemical staining of small intestine sections (jejunum) for cleaved caspase-3.

Displayed are representative figures of control animals (Ctrl), and non-human primates in hemorrhagic shock (HS) treated with either the C3 inhibitor CP40 or the vehicle (saline, NaCl).
